# Supplementary material for: Quinoline Derivatives: Promising Antioxidants with Neuroprotective Potential
Source: MDPI journal article supplement (doi:10.3390/antiox12101853), 2023-10-12
Supplement: s1 [file s1]

# Quinoline Derivatives: Promising Antioxidants with Neuroprotective Potential

Luis Felipe Hernandez-Ayala, Eduardo Gabriel Guzmán-López and Annia Galano \*

## Supporting information

| Contents                                                                                 | Page     |
|------------------------------------------------------------------------------------------|----------|
| <b>Table S1.</b> Properties determined to the Quinoline derivatives                      | <b>1</b> |
| <b>Table S2.</b> ADME, toxicity and synthetic accessibility of the reference set         | <b>2</b> |
| <b>Figure S1.</b> Deprotonation paths and pka values for the 25 most promising dQ        | <b>4</b> |
| <b>Table S3.</b> Ionization energy and bond dissociation energy of quinoline derivatives | <b>7</b> |
| <b>Table S4.</b> Complete set of docking values                                          | <b>9</b> |

| Table S1. Properties determined to the Quinoline derivatives and selection criteria |                                                  |                                                                                                                                                                                                                                                                                                                                                                                                                                  |
|-------------------------------------------------------------------------------------|--------------------------------------------------|----------------------------------------------------------------------------------------------------------------------------------------------------------------------------------------------------------------------------------------------------------------------------------------------------------------------------------------------------------------------------------------------------------------------------------|
| Abbreviation                                                                        | Property                                         | Description                                                                                                                                                                                                                                                                                                                                                                                                                      |
| LogP                                                                                | Lipophilicity coefficient                        | The ADME parameters were estimated using the RDKit package. If the ADME properties comply with the Lipinski, Ghose, Veber, Muggen and Egan rules, the substance is considered to have good bioavailability. A positive (1) or negative (0) value (Sprop= SLogP, SPM, etc.) is assigned if the substance meets the criteria established by the rules, as in some cases the criteria are repeated, the strictest of them is taken. |
| MW                                                                                  | Molecular weight (g/mol)                         |                                                                                                                                                                                                                                                                                                                                                                                                                                  |
| MR                                                                                  | Molar refractivity (m <sup>3</sup> /mol)         |                                                                                                                                                                                                                                                                                                                                                                                                                                  |
| TPSA                                                                                | Topological polar surface area (Å <sup>2</sup> ) |                                                                                                                                                                                                                                                                                                                                                                                                                                  |
| #At                                                                                 | Heavy atoms number                               |                                                                                                                                                                                                                                                                                                                                                                                                                                  |
| HBA                                                                                 | H-bonds acceptor                                 |                                                                                                                                                                                                                                                                                                                                                                                                                                  |
| HBD                                                                                 | H-bond donor                                     |                                                                                                                                                                                                                                                                                                                                                                                                                                  |
| RB                                                                                  | Rotable Bonds                                    |                                                                                                                                                                                                                                                                                                                                                                                                                                  |
| LD <sub>50</sub>                                                                    | Media letal doses (mg/kg)                        | Toxicity parameters were calculated using the TEST program. In particular, the median lethal dose is the amount of substance (mg/Kg body weight) that causes 50% of deaths in a population of rats after oral ingestion. A substance is more toxic the lower its estimated LD50 value [1].                                                                                                                                       |
| M                                                                                   | Ames mutagenicity                                | An agent is positively mutagenic if it induces the growth of a genetically altered strain of Salmonella typhimurium, which has had its growth reverted. If $M \geq 0.5$ , mutagenicity is considered positive, while if $M < 0.5$ mutagenicity is negative [2].                                                                                                                                                                  |

|    |                        |                                                                                                                                                                                                                                                                                            |
|----|------------------------|--------------------------------------------------------------------------------------------------------------------------------------------------------------------------------------------------------------------------------------------------------------------------------------------|
| TD | Developmental toxicity | Whether or not a chemical causes developmental toxicity effects in humans or animals. If $TD \geq 0.5$ the substance is toxic for development and if $TD < 0.5$ it is not [3].                                                                                                             |
| BF | Bioaccumulation factor | Ratio of chemical concentration in fish because of uptake through the respiratory surface to that in steady-state water. While the value of BF is larger, the toxicity of the substance is higher [4].                                                                                     |
| SA | Synthetic accesibility | Synthetic accessibility was calculated with the Ambit-SA[R] program. This parameter indicates the ease of synthesis of a molecule. In the case of Ambit-SA, a molecule that is easy to synthesize has $SA \approx 100$ and a molecule that is difficult to synthesize has $SA \approx 0$ . |

---

#### Selection criteria of ADME properties

---

| Rules            | Criteria                                                                                                                                                                     |
|------------------|------------------------------------------------------------------------------------------------------------------------------------------------------------------------------|
| <b>Lipinski</b>  | $HBD \leq 5$ , $HBA \leq 10$ , $MW < 500$ y $\text{Log P} < 5.0$                                                                                                             |
| <b>Ghose</b>     | $-0.4 \leq \text{LogP} \leq 5.6$ , $40 \leq MR \leq 130$ , $180 \leq MW \leq 480$ , $20 \leq \#At \leq 70$                                                                   |
| <b>Veber</b>     | $RB \leq 10$ , $TPSA \leq 140$                                                                                                                                               |
| <b>Muggen</b>    | $200 \leq MW \leq 600$ , $-2.0 \leq \text{LogP} \leq 5.0$ , $TPSA \leq 150$ , $RB \leq 15$ , $HBD \leq 5$ y $HBA \leq 10$                                                    |
| <b>Egan</b>      | $-1.0 \leq \text{LogP} \leq 5.8$ , $TPSA \leq 130$                                                                                                                           |
| <b>This work</b> | $-0.4 \leq \text{LogP} \leq 5.0$ , $160 \leq MW \leq 480$ , $40 \leq MR \leq 130$ , $TPSA \leq 130$ , $10 \leq \#At \leq 70$ , $RB \leq 15$ , $HBD \leq 5$ and $HBA \leq 10$ |

---

}

**Table S2.** ADME, toxicity and synthetic accessibility of the reference set

| Compound        | logP  | PSA    | AtX | MW     | HBA | HBD | RB | MR     | LD <sub>50</sub> | M         | DT   | BF     | SA    |
|-----------------|-------|--------|-----|--------|-----|-----|----|--------|------------------|-----------|------|--------|-------|
| Acetylcarnitine | -1.24 | 66.43  | 14  | 203.24 | 4   | 0   | 5  | 48.08  | N/A              | N/A       | 0.65 | 4.46   | 89.91 |
| Amantadine      | 1.91  | 26.02  | 11  | 151.25 | 1   | 1   | 0  | 45.09  | 287.44           | 0.18      | 0.75 | 106.10 | 65.15 |
| Apomorphine     | 2.85  | 43.70  | 20  | 267.33 | 3   | 2   | 0  | 77.99  | 153.32           | 1.08      | 0.81 | 79.28  | 66.21 |
| Baclofen        | 1.86  | 63.32  | 14  | 213.66 | 2   | 2   | 4  | 55.50  | 414.85           | 0.18      | 0.83 | 1.82   | 89.13 |
| Benserazide     | -1.76 | 148.07 | 18  | 257.25 | 7   | 7   | 5  | 61.48  | 1825.70          | 0.47      | 0.63 | 0.26   | 85.47 |
| Benzatropine    | 4.42  | 12.47  | 23  | 307.44 | 2   | 0   | 4  | 93.41  | 341.43           | 0.21      | 0.62 | N/A    | 74.54 |
| Biperiden       | 3.96  | 23.47  | 23  | 311.47 | 2   | 1   | 5  | 94.09  | 347.75           | 0.04      | 0.72 | 341.51 | 73.52 |
| Bromocriptine   | 3.19  | 118.21 | 43  | 654.61 | 6   | 3   | 5  | 164.16 | 58.41            | 0.11      | 1.39 | N/A    | 4.53  |
| Cabergoline     | 3.19  | 71.68  | 33  | 451.62 | 4   | 2   | 8  | 132.37 | 573.24           | 0.54      | 1.02 | 8.71   | 39.00 |
| Carbidopa       | -0.05 | 115.81 | 16  | 226.23 | 5   | 5   | 4  | 56.84  | 1996.23          | 0.79      | 0.71 | 0.51   | 79.61 |
| Curcumin        | 3.37  | 93.06  | 27  | 368.39 | 6   | 2   | 8  | 102.02 | 1411.26          | 0.13      | 0.91 | 13.83  | 74.57 |
| Dantrolene      | 1.74  | 118.05 | 23  | 314.26 | 6   | 1   | 4  | 78.64  | 520.79           | 0.55      | 0.84 | 12.64  | 76.26 |
| Donepezil       | 4.36  | 38.77  | 28  | 379.50 | 4   | 0   | 6  | 110.13 | 716.51           | 0.13      | 0.73 | 53.91  | 72.29 |
| Entacapone      | 1.78  | 127.70 | 22  | 305.29 | 6   | 2   | 5  | 77.94  | 1009.98          | 0.94      | 0.97 | 1.26   | 81.65 |
| Galantamine     | 1.85  | 41.93  | 21  | 287.36 | 4   | 1   | 1  | 79.80  | 490.38           | 0.59      | 0.94 | 54.61  | 46.33 |
| Ladostigil      | 2.35  | 41.57  | 20  | 272.35 | 3   | 1   | 4  | 78.67  | 215.22           | 0.20      | 0.89 | 15.94  | 69.78 |
| L-DOPA          | 0.05  | 103.78 | 14  | 197.19 | 4   | 4   | 3  | 49.09  | 2624.71          | 0.20      | 0.53 | 0.26   | 81.53 |
| Lisuride        | 2.84  | 51.37  | 25  | 338.46 | 2   | 2   | 3  | 101.64 | 343.15           | 0.71      | 1.09 | 24.46  | 49.96 |
| Masitinib       | 5.26  | 73.39  | 36  | 498.66 | 7   | 2   | 7  | 146.98 | 2844.94          | 0.52      | 0.81 | 6.61   | 66.10 |
| Melatonin       | 1.86  | 54.12  | 17  | 232.28 | 2   | 2   | 4  | 67.24  | 1913.49          | 0.16      | 0.77 | 3.88   | 78.11 |
| Memantine       | 2.69  | 26.02  | 13  | 179.31 | 1   | 1   | 0  | 54.32  | 277.49           | -<br>0.29 | 0.70 | 151.48 | 62.45 |
| Modafinil       | 2.01  | 60.16  | 19  | 273.36 | 2   | 1   | 5  | 76.93  | 2301.01          | N/A       | 0.74 | 13.79  | 84.62 |
| Piribedil       | 1.53  | 50.72  | 22  | 298.35 | 6   | 0   | 3  | 82.09  | 486.40           | 0.19      | 0.91 | 35.85  | 76.33 |
| Pramipexole     | 1.58  | 50.94  | 14  | 211.33 | 4   | 2   | 3  | 60.63  | 1980.96          | 0.15      | 0.52 | 6.63   | 74.35 |
| Procyclidine    | 3.94  | 23.47  | 21  | 287.45 | 2   | 1   | 5  | 87.20  | 395.47           | -<br>0.03 | 0.48 | 165.96 | 82.08 |
| Remacemide      | 2.22  | 55.12  | 20  | 268.36 | 2   | 2   | 5  | 81.14  | 870.47           | 0.30      | 0.51 | 33.87  | 83.58 |
| Riluzole        | 2.78  | 48.14  | 15  | 234.20 | 4   | 1   | 1  | 50.72  | 173.51           | 1.11      | 0.86 | 6.74   | 78.46 |
| Rivastigmine    | 2.76  | 32.78  | 18  | 250.34 | 3   | 0   | 4  | 72.87  | 389.57           | 0.65      | 0.85 | 9.82   | 79.66 |
| Ropinirole      | 2.85  | 32.34  | 19  | 260.38 | 2   | 1   | 7  | 79.50  | 454.08           | 0.34      | 0.61 | 25.42  | 78.40 |
| Selegiline      | 2.18  | 3.24   | 14  | 187.29 | 1   | 0   | 4  | 61.07  | 311.03           | 1.00      | 0.37 | 38.84  | 83.80 |
| Tacrine         | 2.70  | 38.91  | 15  | 198.27 | 2   | 1   | 0  | 62.80  | 1094.28          | 0.92      | 0.51 | 52.98  | 76.33 |
| Tetrabenazine   | 3.24  | 38.77  | 23  | 317.43 | 4   | 0   | 4  | 90.13  | 554.92           | 0.30      | 0.84 | 109.31 | 69.21 |
| Tizanidine      | 1.72  | 62.20  | 16  | 253.72 | 6   | 2   | 1  | 66.35  | 424.51           | 0.65      | 0.64 | 4.92   | 79.74 |
| Tolcapone       | 2.55  | 100.67 | 20  | 273.24 | 5   | 2   | 3  | 71.04  | 2956.93          | 0.62      | 0.84 | 14.71  | 82.74 |
| Trihexyphenidyl | 4.33  | 23.47  | 22  | 301.47 | 2   | 1   | 5  | 91.82  | 519.12           | 0.09      | 0.59 | 174.69 | 81.82 |
| Brexpiprazole   | 4.72  | 48.57  | 31  | 433.58 | 5   | 1   | 7  | 129.78 | 588.07           | 0.60      | 0.92 | 22.66  | 66.08 |
| Levitiracetam   | -0.13 | 63.40  | 12  | 170.21 | 2   | 1   | 3  | 44.22  | 2412.72          | 0.06      | 0.81 | 0.98   | 83.72 |
| Atuzaginstat    | 2.86  | 81.42  | 27  | 386.41 | 4   | 2   | 10 | 93.61  | 352.37           | 0.38      | 0.78 | 4.26   | 71.62 |
| Blarcamesine    | 3.53  | 12.47  | 21  | 281.40 | 2   | 0   | 4  | 86.28  | 159.46           | -<br>0.20 | 0.36 | 272.63 | 81.46 |

|                          |       |        |    |        |   |   |    |        |         |           |      |        |       |
|--------------------------|-------|--------|----|--------|---|---|----|--------|---------|-----------|------|--------|-------|
| Caffeine                 | -1.03 | 61.82  | 14 | 194.19 | 6 | 0 | 0  | 51.20  | 222.13  | 0.05      | 0.80 | 1.26   | 79.68 |
| Escitalopram             | 3.81  | 36.26  | 24 | 324.40 | 3 | 0 | 5  | 90.91  | 688.70  | 0.29      | 0.78 | 211.14 | 68.02 |
| Guanfacine               | 1.55  | 78.97  | 15 | 246.10 | 2 | 3 | 2  | 60.22  | 845.71  | 0.94      | 0.97 | 3.43   | 87.53 |
| Hydralazine              | 0.92  | 63.83  | 12 | 160.18 | 4 | 2 | 1  | 47.35  | 315.46  | 0.78      | 0.47 | 8.42   | 83.09 |
| Eicosapentaenoic<br>Acid | 6.47  | 26.30  | 24 | 330.51 | 2 | 0 | 14 | 104.94 | 9700.47 | 0.81      | 0.54 | 33.15  | 88.40 |
| Metformin                | -1.03 | 88.99  | 9  | 129.17 | 2 | 4 | 0  | 36.46  | 156.48  | 0.08      | N/A  | N/A    | 93.69 |
| Nilotinib                | 6.36  | 97.62  | 39 | 529.53 | 7 | 2 | 6  | 140.98 | N/A     | 0.43      | 0.87 | 16.34  | 62.79 |
| Simufilam                | 1.04  | 35.58  | 19 | 259.35 | 3 | 1 | 2  | 74.46  | 524.01  | 0.37      | 0.51 | 19.79  | 79.94 |
| Valiltramiprosate        | -0.64 | 109.49 | 15 | 238.31 | 4 | 3 | 6  | 56.86  | 1156.59 | 0.43      | 0.85 | 0.67   | 82.60 |
| Opicapone                | 3.28  | 149.46 | 27 | 413.17 | 8 | 2 | 3  | 93.61  | 1772.59 | 0.25      | 0.69 | 67.49  | 74.81 |
| Rotigotine               | 4.27  | 23.47  | 22 | 315.48 | 3 | 1 | 6  | 93.81  | 702.34  | 0.25      | 0.86 | 84.25  | 70.26 |
| Rasagiline               | 1.90  | 12.03  | 13 | 171.24 | 1 | 1 | 2  | 54.34  | 279.24  | 0.20      | 0.85 | 20.60  | 75.60 |
| Istradefylline           | 2.12  | 80.28  | 28 | 384.44 | 8 | 0 | 6  | 109.06 | 1642.55 | 0.49      | N/A  | 20.61  | 70.05 |
| Pimavanserin             | 4.67  | 44.81  | 31 | 427.56 | 3 | 1 | 8  | 121.47 | 645.60  | 0.10      | 0.80 | 58.30  | 73.81 |
| Fingolimod               | 3.20  | 66.48  | 22 | 307.48 | 3 | 3 | 12 | 92.93  | 5986.27 | -<br>0.05 | 0.61 | 20.86  | 86.39 |

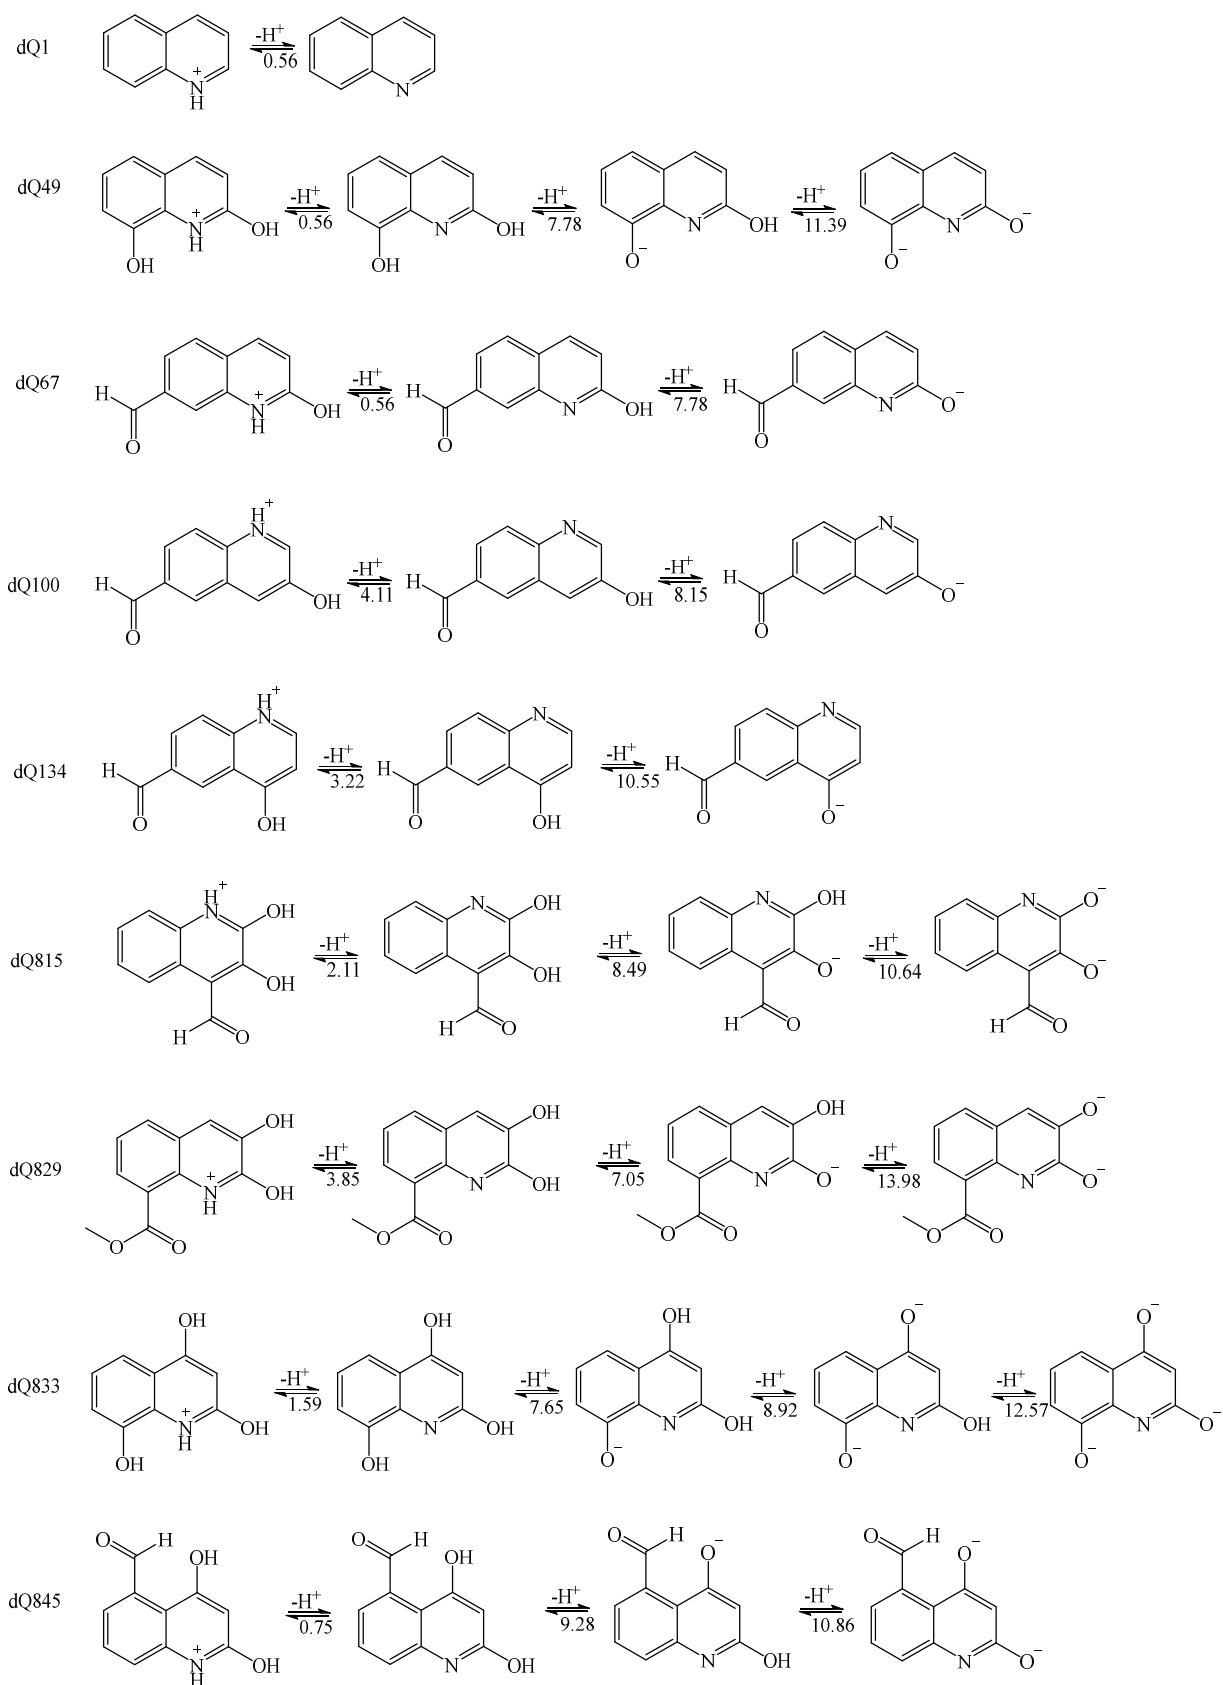

**Figure S1.** Deprotonation paths and pka values for the 25 most promising dQ

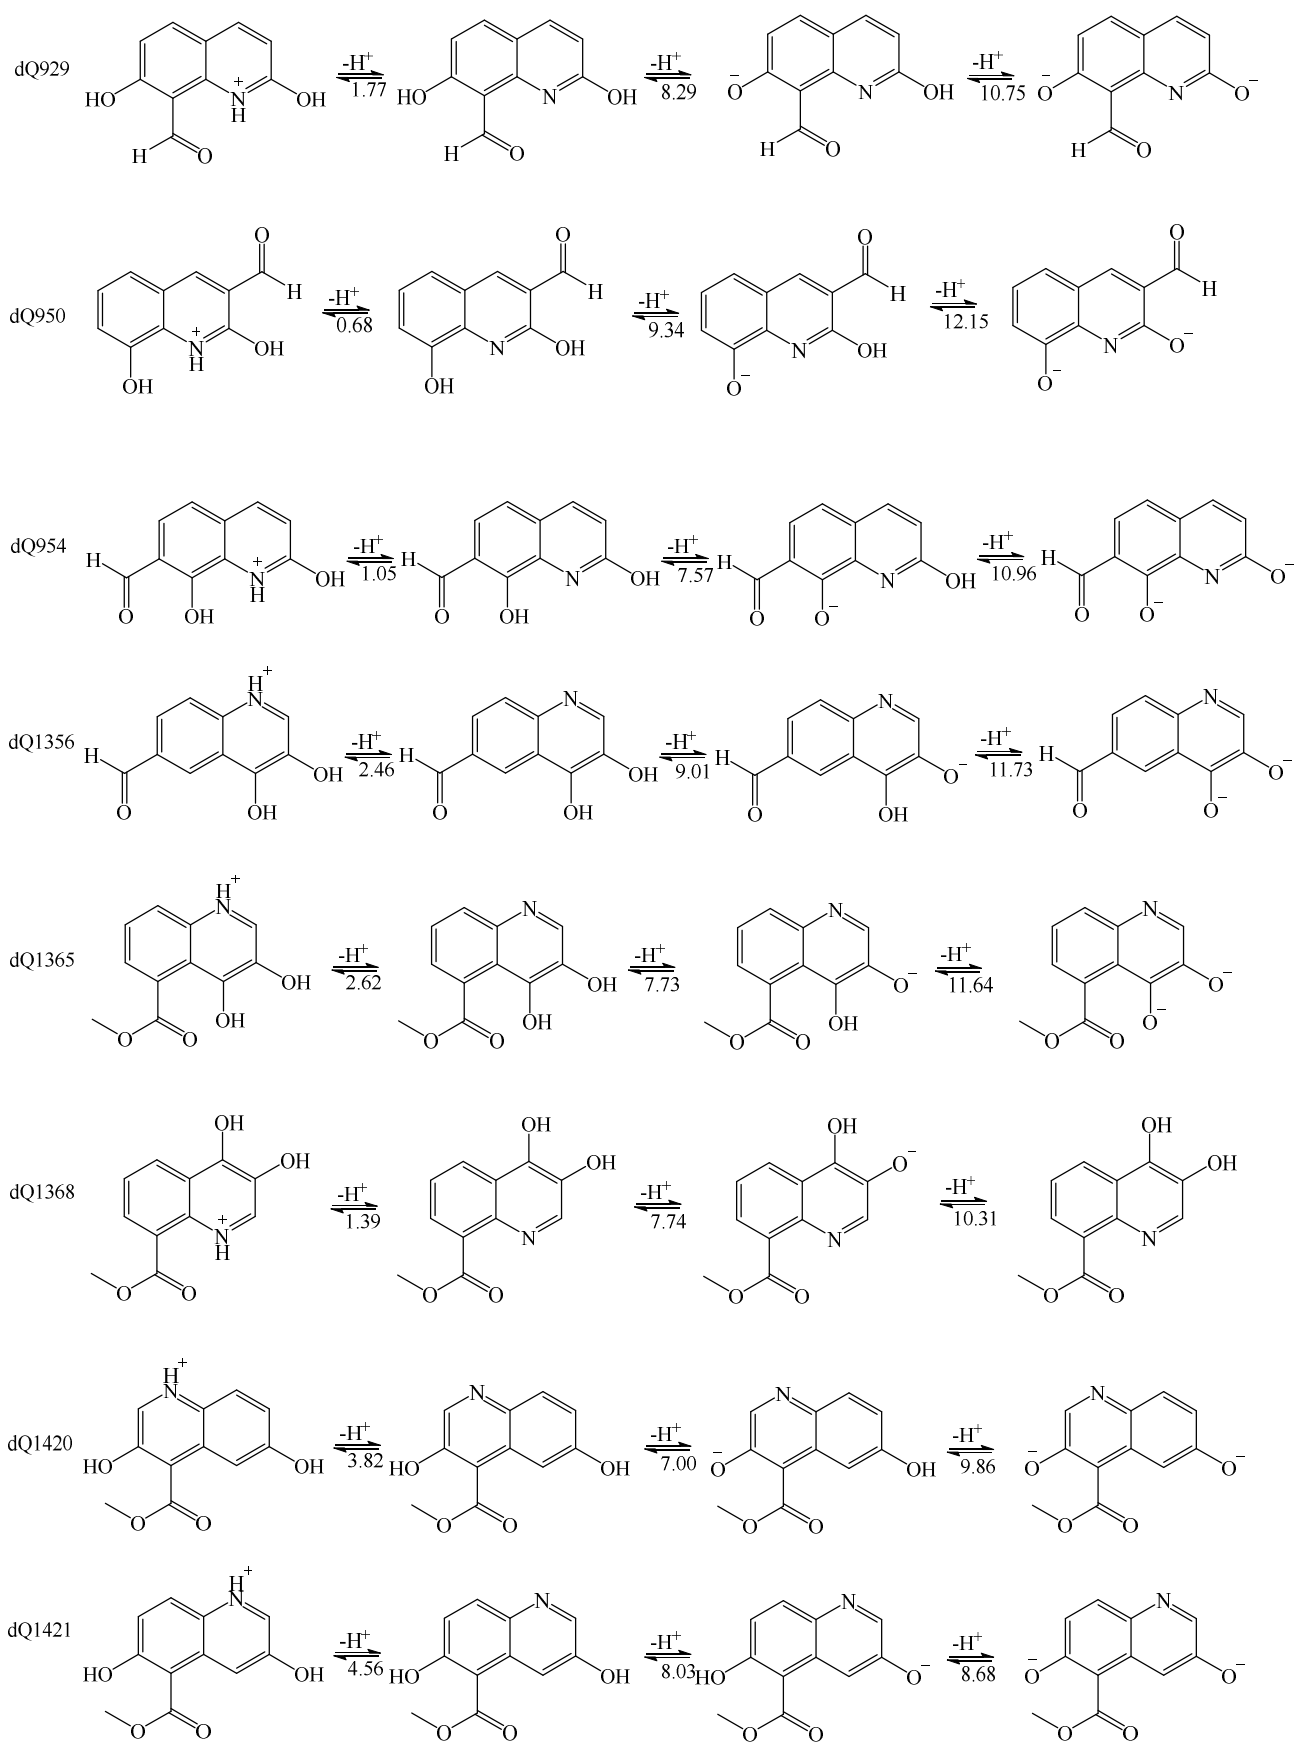

Figure S1. Cont...

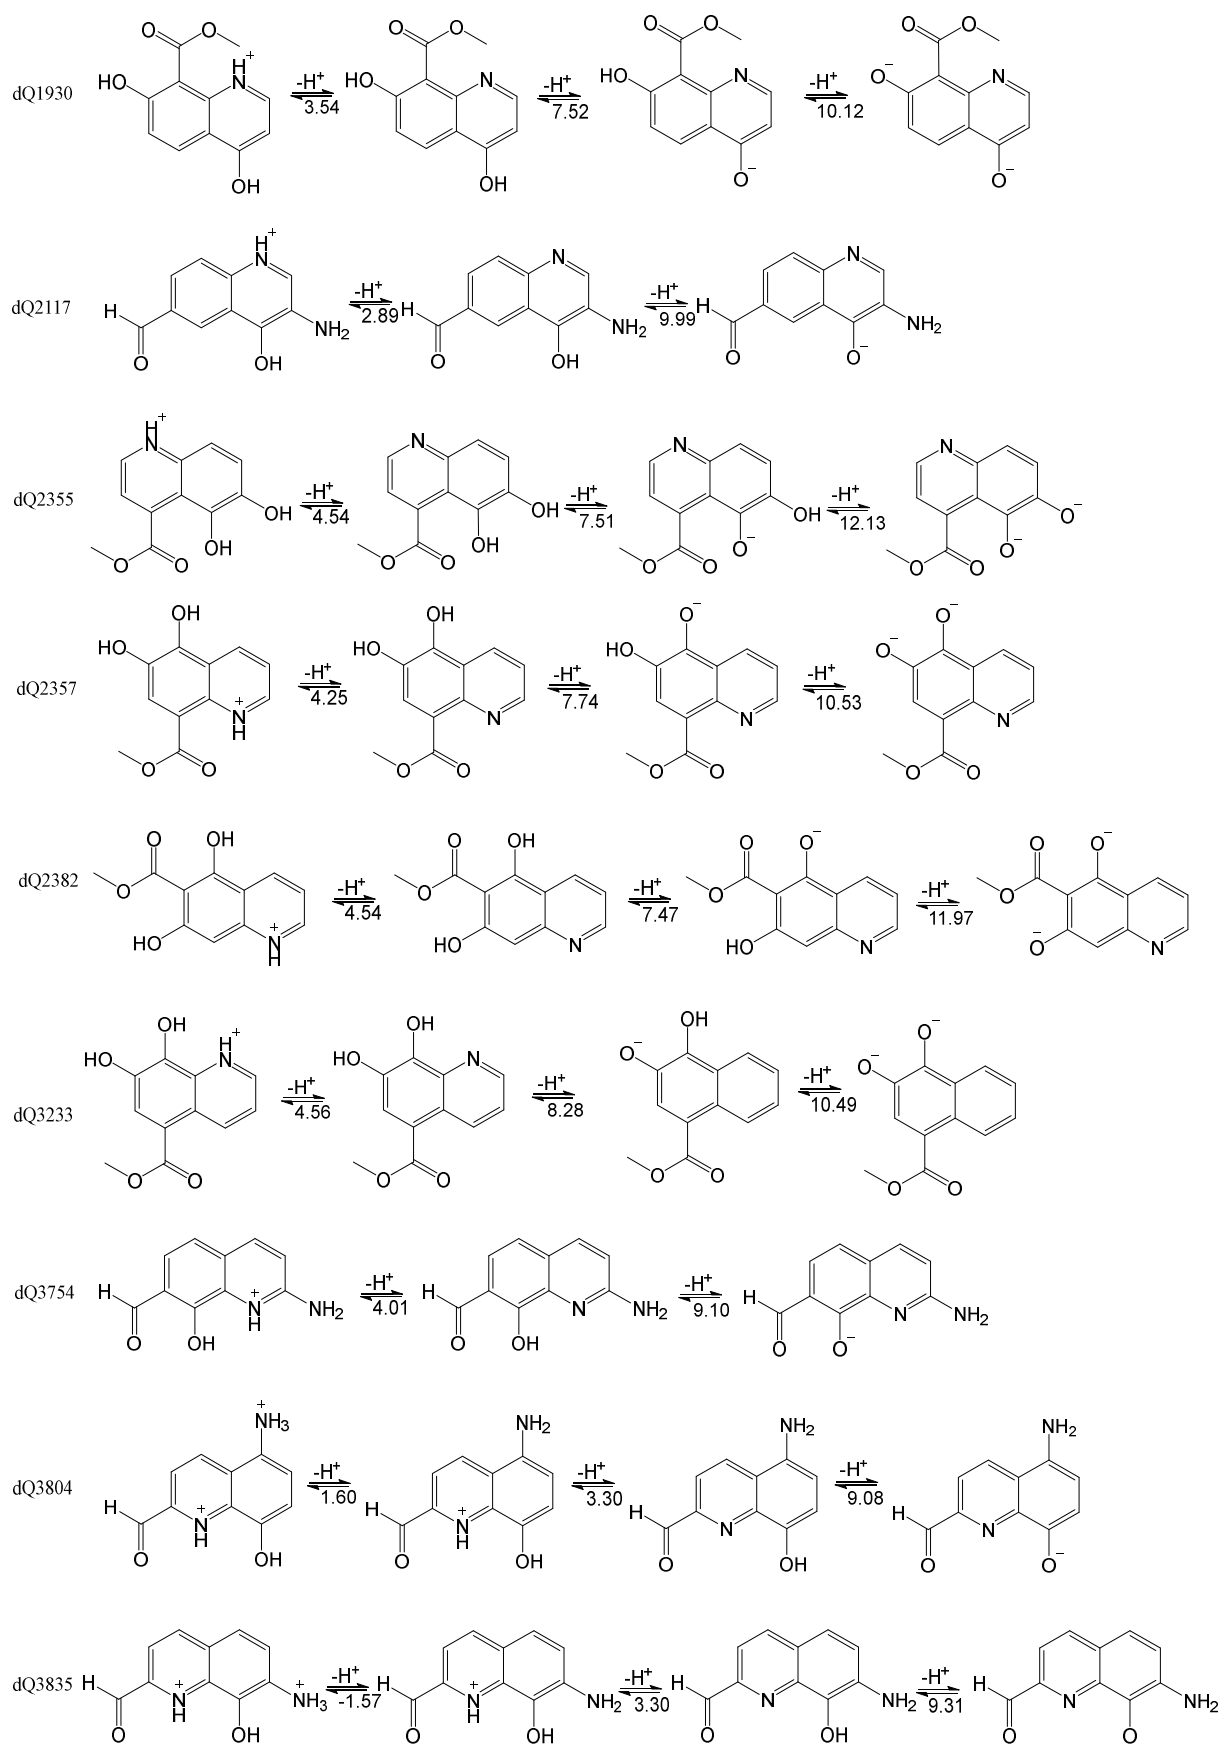

Figure S1. Cont...

| <b>Table S3.</b> Ionization energy and bond dissociation energy of quinoline derivatives |          |               |                            |                       |
|------------------------------------------------------------------------------------------|----------|---------------|----------------------------|-----------------------|
| <b>dQ</b>                                                                                | <b>q</b> | <b>I (eV)</b> | <b>Site</b>                | <b>BDE (Kcal/mol)</b> |
| 49                                                                                       | 0        | 6.15          | OH (R1)                    | 76.68                 |
|                                                                                          |          |               | OH (R7)                    | 83.27                 |
|                                                                                          | -1       | 4.12          | OH (R1)                    | 73.21                 |
| 67                                                                                       | 0        | 6.85          | OH (R1)                    | 88.55                 |
| 100                                                                                      | 0        | 6.60          | OH (R2)                    | 80.30                 |
| 134                                                                                      | 0        | 6.77          | OH (R3)                    | 83.92                 |
| 815                                                                                      | 0        | 6.66          | OH (R2)                    | 82.87                 |
|                                                                                          |          |               | OH (R1)                    | 86.31                 |
|                                                                                          | -1       | 4.37          | OH (R1)                    | 76.42                 |
| 829                                                                                      | 0        | 6.57          | OH (R1)                    | 83.38                 |
|                                                                                          |          |               | OH (R2)                    | 78.20                 |
|                                                                                          |          |               | CH <sub>3</sub> (ester R7) | 90.41                 |
|                                                                                          |          |               | OH (R2)                    | 72.32                 |
|                                                                                          | -1       | 3.92          | CH <sub>3</sub> (ester R7) | 90.45                 |
| 833                                                                                      | 1        | 6.69          | OH (R7)                    | 77.38                 |
|                                                                                          |          |               | OH (R3)                    | 82.32                 |
|                                                                                          |          |               | OH (R1)                    | 89.74                 |
|                                                                                          | 0        | 6.12          | OH (R7)                    | 82.37                 |
|                                                                                          |          |               | OH (R3)                    | 76.40                 |
|                                                                                          |          |               | OH (R1)                    | 82.88                 |
|                                                                                          |          |               | OH (R3)                    | 73.30                 |
|                                                                                          | -1       | 5.48          | OH (R1)                    | 78.48                 |
| 845                                                                                      | 0        | 6.70          | OH (R3)                    | 84.38                 |
|                                                                                          |          |               | OH (R1)                    | 88.47                 |
|                                                                                          | -1       | 5.65          | OH (R1)                    | 85.62                 |
| 929                                                                                      | 0        | 6.64          | OH (R6)                    | 88.74                 |
|                                                                                          |          |               | OH (R1)                    | 86.90                 |
|                                                                                          | -1       | 5.59          | OH (R1)                    | 78.73                 |
| 950                                                                                      | 0        | 6.27          | OH (R7)                    | 77.73                 |
|                                                                                          |          |               | OH (R1)                    | 82.73                 |
|                                                                                          | -1       | 3.57          | OH (R1)                    | 65.68                 |
| 954                                                                                      | 0        | 6.42          | OH (R7)                    | 78.59                 |
|                                                                                          |          |               | OH (R1)                    | 85.10                 |
|                                                                                          | -1       | 5.28          | OH (R1)                    | 73.71                 |
| 1356                                                                                     | 0        | 6.40          | OH (R2)                    | 72.89                 |
|                                                                                          |          |               | OH (R3)                    | 73.07                 |
|                                                                                          | -1       | 3.74          | OH(R3)                     | 62.60                 |
| 1365                                                                                     | 0        | 6.36          | OH (R2)                    | 75.13                 |
|                                                                                          |          |               | OH (R3)                    | 73.36                 |
|                                                                                          |          |               | CH <sub>3</sub> (ester R4) | 90.51                 |
|                                                                                          |          |               | OH (R3)                    | 61.61                 |
|                                                                                          | -1       | 5.08          | CH <sub>3</sub> (ester R4) | 91.39                 |
| 1368                                                                                     | 0        | 6.37          | OH (R2)                    | 75.02                 |
|                                                                                          |          |               | OH (R3)                    | 74.30                 |



|      |    |            |                            |         |
|------|----|------------|----------------------------|---------|
|      |    |            | CH <sub>3</sub> (ester R7) | 89.91   |
|      | -1 | 3.71       | OH (R3)                    | 62.86   |
|      |    |            | CH <sub>3</sub> (ester R7) | 90.22   |
| 1420 |    |            | OH (R2)                    | 80.70   |
|      | 0  | 6.56       | OH (R5)                    | 79.80   |
|      |    |            | CH <sub>3</sub> (ester R3) | 90.42   |
|      | -1 | 5.43       | OH (R5)                    | 78.17   |
|      |    |            | CH <sub>3</sub> (ester R5) | 90.10   |
| 1421 |    |            | OH (R2)                    | 81.16   |
|      | 0  | 6.48       | OH (R5)                    | 80.60   |
|      |    |            | CH <sub>3</sub> (ester R4) | 90.63   |
|      | -1 | 5.23       | OH (R5)                    | 77.56   |
|      | -2 | 21209.4897 | CH <sub>3</sub> (ester R4) | 91.07   |
| 1930 |    |            | CH <sub>3</sub> (ester R4) | 89.93   |
|      |    |            | OH (R3)                    | 82.09   |
|      | 0  | 6.57       | OH (R6)                    | 83.42   |
|      |    |            | CH <sub>3</sub> (ester R7) | 90.93   |
|      | -1 | 5.37       | OH (R6)                    | 78.27   |
|      |    |            | CH <sub>3</sub> (ester R7) | 90.59   |
| 2117 | 0  | 5.87       | OH (R3)                    | 64.75   |
|      |    |            | NH <sub>2</sub> (R2)       | 81.46   |
| 2355 |    |            | OH (R4)                    | 68.90   |
|      | 0  | 6.04       | OH (R5)                    | 72.29   |
|      |    |            | CH <sub>3</sub> (ester R3) | 91.45   |
|      | -1 | 3.49       | OH (R5)                    | 62.84   |
|      |    |            | CH <sub>3</sub> (ester R3) | 90.67   |
| 2357 |    |            | OH (R4)                    | 72.52   |
|      | 0  | 6.16       | OH (R5)                    | 70.01   |
|      |    |            | CH <sub>3</sub> (ester R7) | 89.89   |
|      | -1 | 3.62       | OH (R5)                    | 62.02   |
|      |    |            | CH <sub>3</sub> (ester R7) | 90.26   |
| 2382 |    |            | OH (R4)                    | 86.59   |
|      | 1  | 6.71       | OH (R6)                    | 86.82   |
|      |    |            | CH <sub>3</sub> (ester R5) | 91.82   |
|      |    |            | OH (R4)                    | 79.86   |
|      | 0  | 6.16       | OH (R6)                    | 80.94   |
|      |    |            | CH <sub>3</sub> (ester R5) | 91.72   |
|      | -1 | 5.085      | OH (R4)                    | 70.39   |
|      |    |            | CH <sub>3</sub> (ester R5) | 90.26   |
| 3233 |    |            | OH (R6)                    | -311.90 |
|      | 0  | 6.23       | OH (R7)                    | -311.90 |
|      |    |            | CH <sub>3</sub> (ester R4) | -311.90 |
|      | -1 | 5.06       | OH (R7)                    | -311.90 |
|      |    |            | CH <sub>3</sub> (ester R4) | -311.90 |
| 3754 |    |            | OH (R7)                    | 76.57   |
|      | 0  | 6.12       | NH <sub>2</sub> (R2)       | 90.51   |
|      | -1 | 5.16       | NH <sub>2</sub> (R2)       | 84.22   |

|      |    |      |                      |        |
|------|----|------|----------------------|--------|
| 3804 | 0  | 4.17 | OH (R7)              | 65.61  |
|      |    |      | NH <sub>2</sub> (R4) | 76.65  |
|      | -1 | 4.55 | NH <sub>2</sub> (R4) | 68.72  |
| 3835 | 0  | 4.29 | OH (R2)              | 65.66  |
|      |    |      | NH <sub>2</sub> (R3) | 104.24 |
|      | -1 | 4.56 | NH <sub>2</sub> (R3) | 71.04  |

**Table S4.** Complete set of docking values

| dQ        | COMT                     |      |                              |        |                              |       |                              |      | $\Delta G_B^w$<br>(Kcal/m<br>ol) |
|-----------|--------------------------|------|------------------------------|--------|------------------------------|-------|------------------------------|------|----------------------------------|
|           | q=1                      |      | q=0                          |        | q=-1                         |       | q=-2                         |      |                                  |
|           | $\Delta G$<br>(Kcal/mol) | X%   | $\Delta G$<br>(Kcal/m<br>ol) | X%     | $\Delta G$<br>(Kcal/m<br>ol) | X%    | $\Delta G$<br>(Kcal/m<br>ol) | X%   |                                  |
| 1         | 0.00                     | 0.00 | -5.00                        | 100.00 | 0.00                         | 0.00  | 0.00                         | 0.00 | -5.00                            |
| 49        | 0.00                     | 0.00 | -5.90                        | 79.60  | -6.10                        | 21.40 | 0.00                         | 0.00 | -6.00                            |
| 67        | 0.00                     | 0.00 | -5.60                        | 98.70  | -5.50                        | 1.30  | 0.00                         | 0.00 | -5.60                            |
| 100       | 0.00                     | 0.00 | -5.80                        | 84.90  | -5.40                        | 15.10 | 0.00                         | 0.00 | -5.74                            |
| 134       | 0.00                     | 0.00 | -5.50                        | 100.00 | 0.00                         | 0.00  | 0.00                         | 0.00 | -5.50                            |
| 815       | 0.00                     | 0.00 | -6.30                        | 92.40  | -5.80                        | 7.60  | 0.00                         | 0.00 | -6.26                            |
| 829       | 0.00                     | 0.00 | -5.90                        | 30.90  | -7.20                        | 69.10 | 0.00                         | 0.00 | -6.80                            |
| 833       | -5.90                    | 1.10 | -5.90                        | 63.30  | -6.00                        | 35.60 | 0.00                         | 0.00 | -5.94                            |
| 845       | 0.00                     | 0.00 | -5.80                        | 98.70  | -5.90                        | 1.30  | 0.00                         | 0.00 | -5.80                            |
| 929       | 0.00                     | 0.00 | -5.60                        | 88.60  | -5.70                        | 11.40 | 0.00                         | 0.00 | -5.61                            |
| 950       | 0.00                     | 0.00 | -5.50                        | 98.80  | -5.30                        | 1.20  | 0.00                         | 0.00 | -5.50                            |
| 955       | 0.00                     | 0.00 | -5.70                        | 59.70  | -5.90                        | 40.30 | 0.00                         | 0.00 | -5.78                            |
| 1356      | 0.00                     | 0.00 | -6.00                        | 97.70  | -5.70                        | 2.30  | 0.00                         | 0.00 | -5.99                            |
| 1365      | 0.00                     | 0.00 | -5.50                        | 68.10  | -5.50                        | 31.20 | 0.00                         | 0.00 | -5.46                            |
| 1368      | 0.00                     | 0.00 | -6.10                        | 31.40  | -5.90                        | 68.60 | 0.00                         | 0.00 | -5.96                            |
| 1420      | 0.00                     | 0.00 | -5.50                        | 28.70  | -5.60                        | 71.30 | 0.00                         | 0.00 | -5.57                            |
| 1421      | 0.00                     | 0.00 | -5.40                        | 80.10  | -5.30                        | 18.80 | -5.40                        | 1.00 | -5.38                            |
| 1930      | 0.00                     | 0.00 | -5.60                        | 56.80  | -5.70                        | 43.20 | 0.00                         | 0.00 | -5.64                            |
| 2117      | 0.00                     | 0.00 | -5.30                        | 100.00 | 0.00                         | 0.00  | 0.00                         | 0.00 | -5.30                            |
| 2355      | 0.00                     | 0.00 | -5.60                        | 56.30  | -5.80                        | 43.70 | 0.00                         | 0.00 | -5.69                            |
| 2357      | 0.00                     | 0.00 | -6.20                        | 68.60  | -6.50                        | 31.40 | 0.00                         | 0.00 | -6.29                            |
| 2382      | -5.60                    | 4.30 | -5.50                        | 92.80  | -5.30                        | 2.90  | 0.00                         | 0.00 | -5.50                            |
| 3233      | 0.00                     | 0.00 | -6.10                        | 54.00  | -5.80                        | 46.00 | 0.00                         | 0.00 | -5.96                            |
| 3754      | 0.00                     | 0.00 | -5.10                        | 98.00  | -5.40                        | 2.00  | 0.00                         | 0.00 | -5.11                            |
| 3804      | 0.00                     | 0.00 | -5.30                        | 98.00  | -5.40                        | 2.00  | 0.00                         | 0.00 | -5.30                            |
| 3835      | 0.00                     | 0.00 | -5.10                        | 98.80  | -5.10                        | 1.20  | 0.00                         | 0.00 | -5.10                            |
| Tolcapone |                          |      |                              |        |                              |       |                              |      | -7.60                            |
| Dopamine  |                          |      |                              |        |                              |       |                              |      | -5.40                            |
|           |                          |      |                              |        |                              |       |                              |      |                                  |
| dQ        | MAOB                     |      |                              |        |                              |       |                              |      |                                  |
|           | q=1                      |      | q=0                          |        | q=-1                         |       | q=-2                         |      |                                  |

|                  | $\Delta G$<br>(Kcal/mol) | X%   | $\Delta G$ (Kcal/mol) | X%         | $\Delta G$ (Kcal/mol) | X%        | $\Delta G$ (Kcal/mol) | X<br>%   | $\Delta G_B^W$<br>(Kcal/mol) |
|------------------|--------------------------|------|-----------------------|------------|-----------------------|-----------|-----------------------|----------|------------------------------|
| 1                | 0.00                     | 0.00 | -6.90                 | 100.<br>00 | 0.00                  | 0.00      | 0.00                  | 0.0<br>0 | -6.90                        |
| 49               | 0.00                     | 0.00 | -7.60                 | 79.6<br>0  | -7.80                 | 29.4<br>0 | 0.00                  | 0.0<br>0 | -8.34                        |
| 67               | 0.00                     | 0.00 | -7.70                 | 98.7<br>0  | -7.80                 | 1.30      | 0.00                  | 0.0<br>0 | -7.70                        |
| 100              | 0.00                     | 0.00 | -7.40                 | 84.9<br>0  | -7.60                 | 15.1<br>0 | 0.00                  | 0.0<br>0 | -7.43                        |
| 134              | 0.00                     | 0.00 | -7.60                 | 100.<br>00 | 0.00                  | 0.00      | 0.00                  | 0.0<br>0 | -7.60                        |
| 815              | 0.00                     | 0.00 | -7.90                 | 92.4<br>0  | -8.00                 | 7.60      | 0.00                  | 0.0<br>0 | -7.91                        |
| 829              | 0.00                     | 0.00 | -8.00                 | 30.9<br>0  | -8.60                 | 69.1<br>0 | 0.00                  | 0.0<br>0 | -8.41                        |
| 833              | -7.50                    | 1.10 | -7.50                 | 63.3<br>0  | -7.70                 | 35.6<br>0 | 0.00                  | 0.0<br>0 | -7.57                        |
| 845              | 0.00                     | 0.00 | -7.60                 | 98.7<br>0  | -7.80                 | 1.30      | 0.00                  | 0.0<br>0 | -7.60                        |
| 929              | 0.00                     | 0.00 | -7.80                 | 88.6<br>0  | -7.90                 | 11.4<br>0 | 0.00                  | 0.0<br>0 | -7.81                        |
| 950              | 0.00                     | 0.00 | -8.00                 | 98.8<br>0  | -8.50                 | 1.20      | 0.00                  | 0.0<br>0 | -8.01                        |
| 955              | 0.00                     | 0.00 | -8.00                 | 59.7<br>0  | -8.40                 | 40.3<br>0 | 0.00                  | 0.0<br>0 | -8.16                        |
| 1356             | 0.00                     | 0.00 | -8.00                 | 97.7<br>0  | 7.90                  | 2.30      | 0.00                  | 0.0<br>0 | -7.63                        |
| 1365             | 0.00                     | 0.00 | -7.80                 | 68.1<br>0  | -7.90                 | 31.2<br>0 | 0.00                  | 0.0<br>0 | -7.78                        |
| 1368             | 0.00                     | 0.00 | -7.80                 | 31.4<br>0  | -8.20                 | 68.6<br>0 | 0.00                  | 0.0<br>0 | -8.07                        |
| 1420             | 0.00                     | 0.00 | -7.70                 | 28.4<br>0  | -7.80                 | 71.3<br>0 | 0.00                  | 0.0<br>0 | -7.75                        |
| 1421             | 0.00                     | 0.00 | -7.50                 | 80.1<br>0  | -7.40                 | 18.8<br>0 | -7.60                 | 1.0<br>0 | -7.47                        |
| 1930             | 0.00                     | 0.00 | -7.50                 | 56.8<br>0  | -7.60                 | 43.2<br>0 | 0.00                  | 0.0<br>0 | -7.54                        |
| 2117             | 0.00                     | 0.00 | -7.90                 | 99.9<br>0  | 0.00                  | 0.00      | 0.00                  | 0.0<br>0 | -7.89                        |
| 2355             | 0.00                     | 0.00 | -7.80                 | 56.3<br>0  | -7.90                 | 43.7<br>0 | 0.00                  | 0.0<br>0 | -7.84                        |
| 2357             | 0.00                     | 0.00 | -8.00                 | 68.6<br>0  | -8.20                 | 31.4<br>0 | 0.00                  | 0.0<br>0 | -8.06                        |
| 2382             | -7.80                    | 4.30 | -7.80                 | 92.8<br>0  | -7.80                 | 2.90      | 0.00                  | 0.0<br>0 | -7.80                        |
| 3233             | 0.00                     | 0.00 | -7.40                 | 54.0<br>0  | -7.60                 | 46.0<br>0 | 0.00                  | 0.0<br>0 | -7.49                        |
| 3754             | 0.00                     | 0.00 | -8.00                 | 98.0<br>0  | -8.50                 | 2.00      | 0.00                  | 0.0<br>0 | -8.01                        |
| 3804             | 0.00                     | 0.00 | -7.80                 | 98.0<br>0  | -7.90                 | 2.00      | 0.00                  | 0.0<br>0 | -7.80                        |
| 3835             | 0.00                     | 0.00 | -8.20                 | 98.8<br>0  | -8.50                 | 1.20      | 0.00                  | 0.0<br>0 | -8.20                        |
| Safinamide       |                          |      |                       |            |                       |           |                       |          | -10.00                       |
| Phenylethylamine |                          |      |                       |            |                       |           |                       |          | -6.00                        |

| dQ            | COMT                     |      |                          |        |                          |       |                          |      | $\Delta G^B_w$<br>(Kcal/mol) |
|---------------|--------------------------|------|--------------------------|--------|--------------------------|-------|--------------------------|------|------------------------------|
|               | q=1                      |      | q=0                      |        | q=-1                     |       | q=-2                     |      |                              |
|               | $\Delta G$<br>(Kcal/mol) | X%   | $\Delta G$<br>(Kcal/mol) | X%     | $\Delta G$<br>(Kcal/mol) | X%    | $\Delta G$<br>(Kcal/mol) | X%   |                              |
| 1             | 0.00                     | 0.00 | -3.80                    | 100.00 | 0.00                     | 0.00  | 0.00                     | 0.00 | -3.80                        |
| 49            | 0.00                     | 0.00 | -7.50                    | 79.60  | -7.60                    | 29.40 | 0.00                     | 0.00 | -8.20                        |
| 67            | 0.00                     | 0.00 | -8.00                    | 98.70  | -8.20                    | 1.30  | 0.00                     | 0.00 | -8.00                        |
| 100           | 0.00                     | 0.00 | -7.80                    | 84.90  | -7.70                    | 15.10 | 0.00                     | 0.00 | -7.78                        |
| 134           | 0.00                     | 0.00 | -7.70                    | 100.00 | 0.00                     | 0.00  | 0.00                     | 0.00 | -7.70                        |
| 815           | 0.00                     | 0.00 | -8.00                    | 92.40  | -8.30                    | 7.60  | 0.00                     | 0.00 | -8.02                        |
| 829           | 0.00                     | 0.00 | -8.60                    | 30.90  | -8.80                    | 69.10 | 0.00                     | 0.00 | -8.74                        |
| 833           | -7.60                    | 1.10 | -7.70                    | 63.30  | -7.80                    | 35.60 | 0.00                     | 0.00 | -7.73                        |
| 845           | 0.00                     | 0.00 | -7.90                    | 98.70  | -8.30                    | 1.30  | 0.00                     | 0.00 | -7.91                        |
| 929           | 0.00                     | 0.00 | -8.00                    | 88.60  | -8.10                    | 11.40 | 0.00                     | 0.00 | -8.01                        |
| 950           | 0.00                     | 0.00 | -7.80                    | 98.80  | -7.90                    | 1.20  | 0.00                     | 0.00 | -7.80                        |
| 955           | 0.00                     | 0.00 | -8.20                    | 59.70  | -8.30                    | 40.30 | 0.00                     | 0.00 | -8.24                        |
| 1356          | 0.00                     | 0.00 | -8.10                    | 97.70  | -8.10                    | 2.30  | 0.00                     | 0.00 | -8.10                        |
| 1365          | 0.00                     | 0.00 | -7.80                    | 68.10  | -7.80                    | 31.20 | 0.00                     | 0.00 | -7.75                        |
| 1368          | 0.00                     | 0.00 | -8.10                    | 31.40  | -8.30                    | 68.60 | 0.00                     | 0.00 | -8.24                        |
| 1420          | 0.00                     | 0.00 | -8.10                    | 28.40  | -8.20                    | 71.30 | 0.00                     | 0.00 | -8.15                        |
| 1421          | 0.00                     | 0.00 | -8.00                    | 80.10  | -8.00                    | 18.80 | -8.20                    | 1.00 | -7.99                        |
| 1930          | 0.00                     | 0.00 | -7.90                    | 56.80  | -8.10                    | 43.20 | 0.00                     | 0.00 | -7.99                        |
| 2117          | 0.00                     | 0.00 | -8.10                    | 99.90  | 0.00                     | 0.00  | 0.00                     | 0.00 | -8.09                        |
| 2355          | 0.00                     | 0.00 | -7.80                    | 56.30  | -8.00                    | 43.70 | 0.00                     | 0.00 | -7.89                        |
| 2357          | 0.00                     | 0.00 | -7.80                    | 68.60  | -8.20                    | 31.40 | 0.00                     | 0.00 | -7.93                        |
| 2382          | 8.10                     | 4.30 | -8.10                    | 92.80  | 8.20                     | 2.90  | 0.00                     | 0.00 | -6.93                        |
| 3233          | 0.00                     | 0.00 | -8.00                    | 54.00  | -8.30                    | 46.00 | 0.00                     | 0.00 | -8.14                        |
| 3754          | 0.00                     | 0.00 | -8.10                    | 98.00  | -8.50                    | 2.00  | 0.00                     | 0.00 | -8.11                        |
| 3804          | 0.00                     | 0.00 | -8.20                    | 98.00  | -8.10                    | 2.00  | 0.00                     | 0.00 | -8.20                        |
| 3835          | 0.00                     | 0.00 | -8.10                    | 98.80  | -8.20                    | 1.20  | 0.00                     | 0.00 | -8.10                        |
| Donepezil     |                          |      |                          |        |                          |       |                          |      | -12.00                       |
| Acetylcholine |                          |      |                          |        |                          |       |                          |      | -4.90                        |
